# Supplementary material for: Immobilization of Thermomyces lanuginosus lipase on ZnO nanoparticles: mimicking the interfacial environment
Source: Royal Society of Chemistry journal article supplement (doi:10.1039/c5ra02249e), 2015-01-01
Supplement: c5ra02249e1.pdf [file c5ra02249e1.pdf]

*Supporting Information*

*for*

**Immobilization of *Thermomyces Lanuginosus* Lipase on ZnO Nanoparticles:  
Mimicking the Interfacial Environment**

**Ekta Shah, Paramita Mahapatra, Ashutosh V. Bedekar, Hemant P. Soni\***

**Department of Chemistry, Faculty of Science, The Maharaja Sayajirao University of  
Baroda, Vadodara-390 002, Gujarat, India.**

**\*Author for Correspondance: Hemant P.Soni**

**E-mail. [drhpsoni@yahoo.co.in](mailto:drhpsoni@yahoo.co.in)**

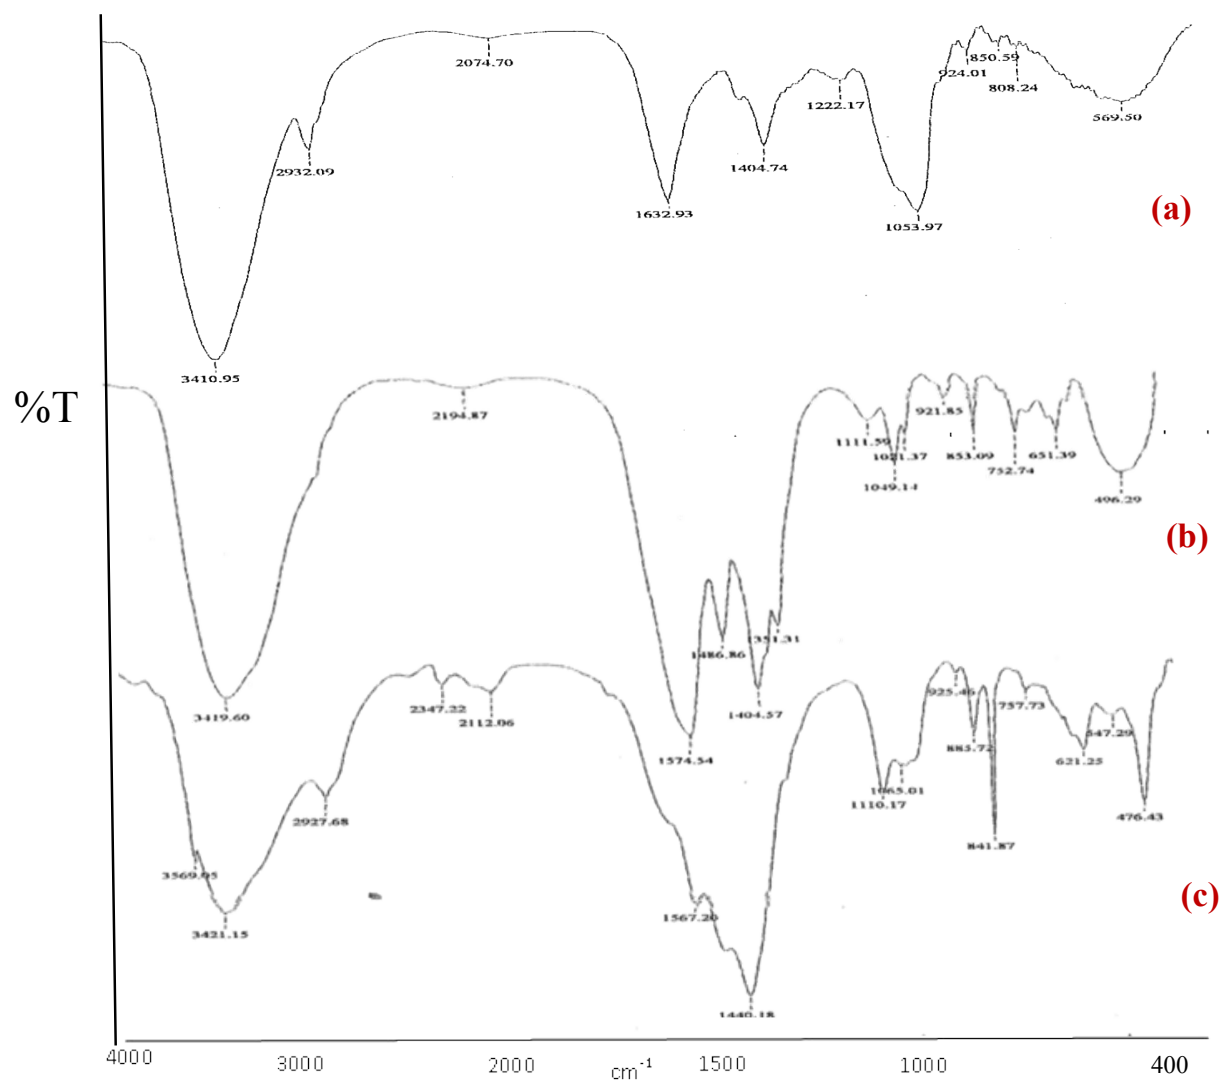

**Figure S1. FTIR spectra of (a) free TLL enzyme (b) ZnO/Glycine nanoparticles (c) ZnO/Glycine/glutaraldehyde/Enzyme nanoparticles.**

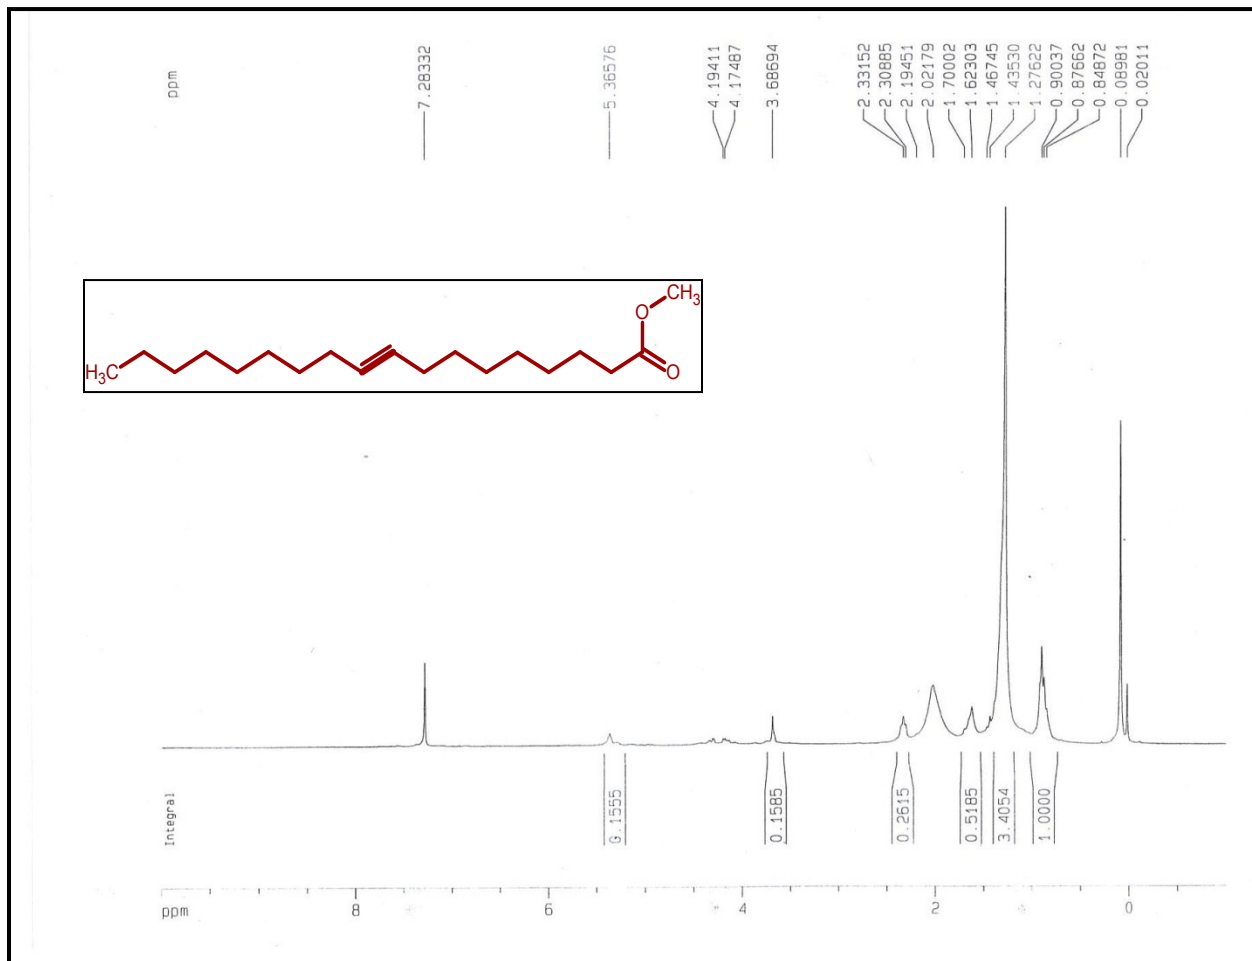

Figure S2. <sup>1</sup>H NMR of methyl oleate (by enzymatic route).

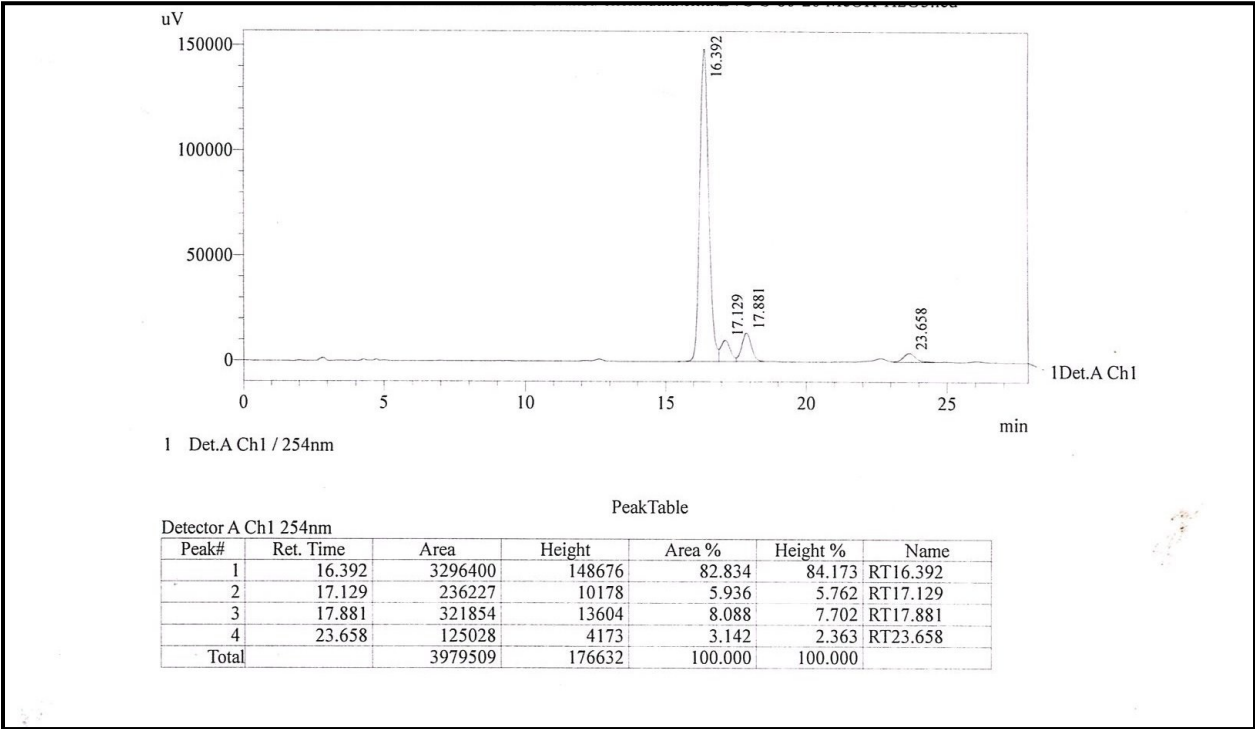

**Figure S3. HPLC analysis of methyloleate.**

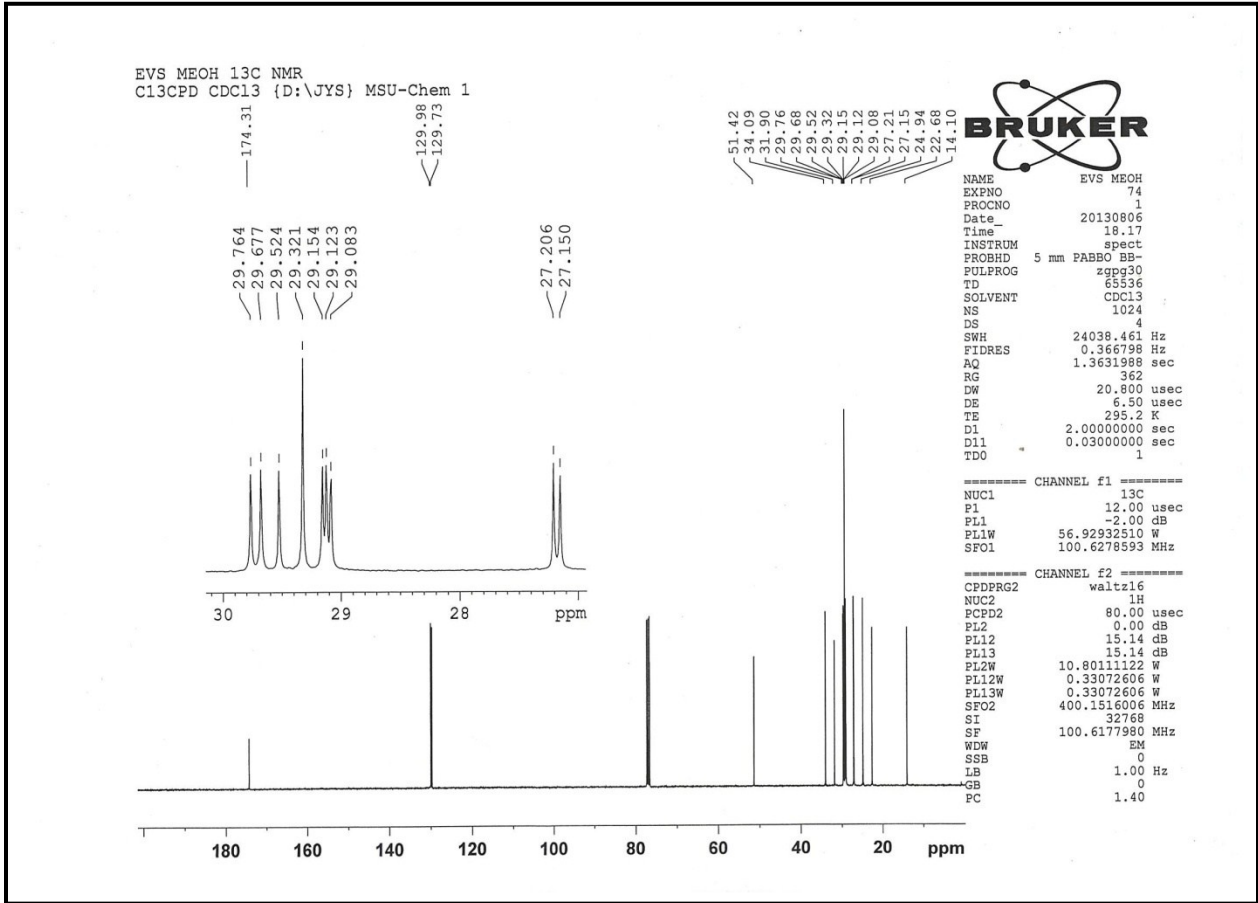

Figure S4. <sup>13</sup>C NMR of Methyl oleate.
